# Supplementary material for: Facile synthesis of RuOx/SiC/C for photoelectrocatalysis
Source: Royal Society of Chemistry journal article supplement (doi:10.1039/d1qi00552a), 2021-01-01
Supplement: d1qi00552a1.pdf [file d1qi00552a1.pdf]

## Supporting information

### Facile synthesis of RuO<sub>x</sub>/SiC/C for photo-electrocatalysis

Aya Gomaa Abdelkader Mohamed,<sup>ab</sup> Xiang Zhang <sup>\*a</sup> and Yaobing Wang <sup>\*ac</sup>

<sup>a</sup> CAS Key Laboratory of Design and Assembly of Functional Nanostructures, and Fujian Provincial Key Laboratory of Nanomaterials, State Key Laboratory of Structural Chemistry, Key Laboratory of Optoelectronic Materials Chemistry and Physics, Fujian Institute of Research on the Structure of Matter, Chinese Academy of Sciences, Fuzhou, Fujian 350002, China

<sup>b</sup> University of Chinese Academy of Sciences, Beijing 100049, P. R. China

<sup>c</sup> Dalian National Laboratory for Clean Energy, Dalian 116023, China

**E-mails:** [zhangxiang@fjirsm.ac.cn](mailto:zhangxiang@fjirsm.ac.cn), [wangyb@fjirsm.ac.cn](mailto:wangyb@fjirsm.ac.cn)

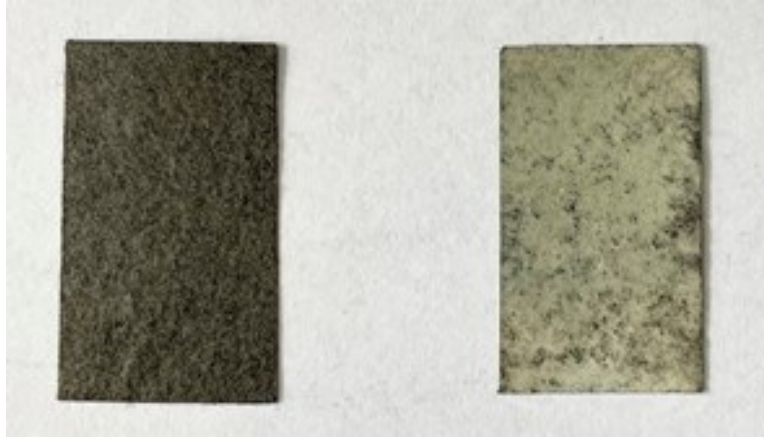

**Fig. S1.** The color change of carbon paper before and after SiC growth.

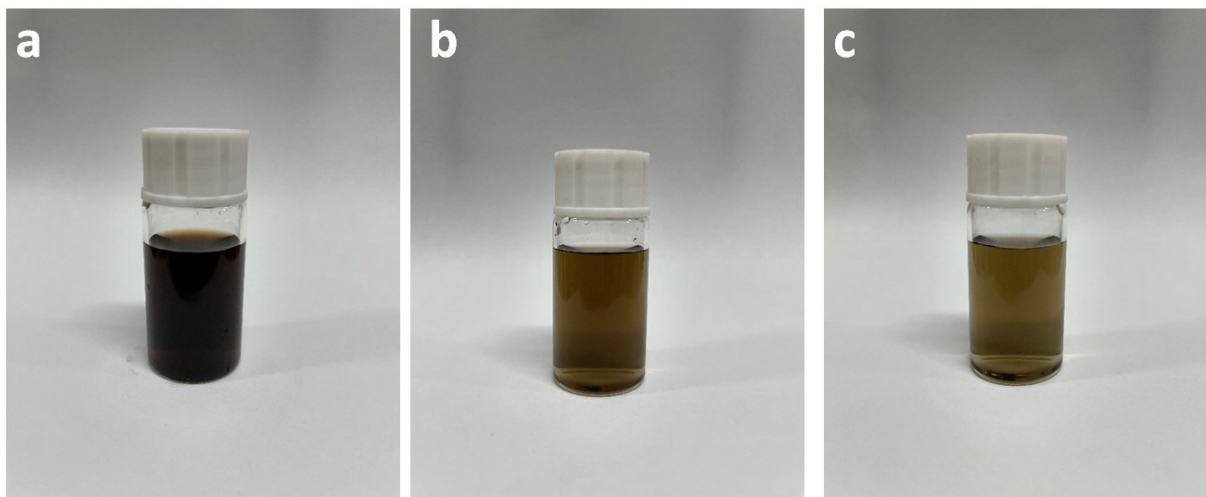

**Fig. S2.** The color change of Ru solution before (a) and after 1h (b) and 2h (c) photo-deposition.

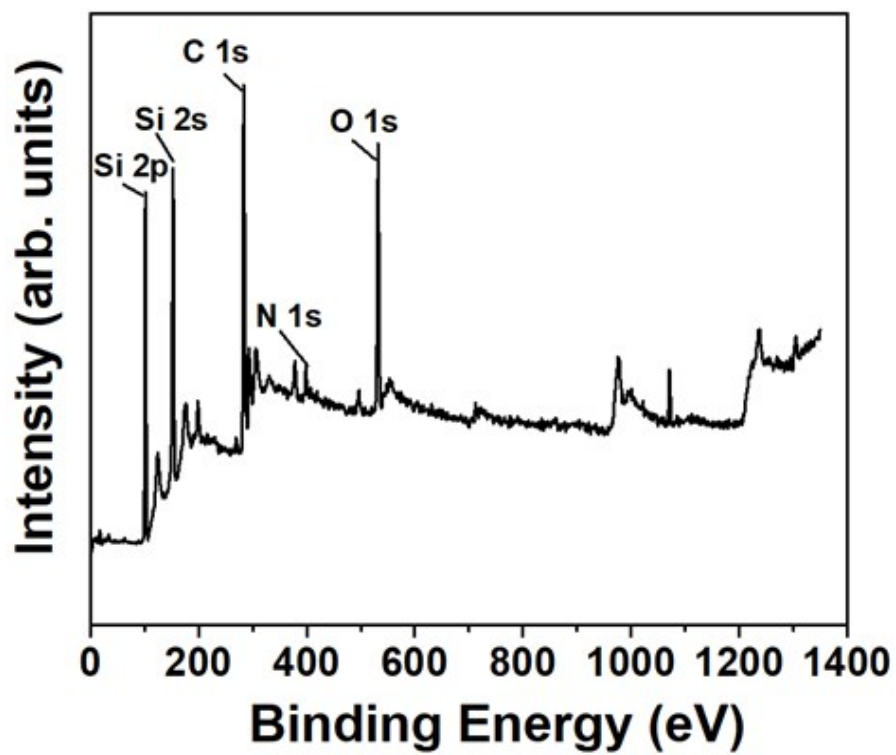

Fig. S3. XPS survey spectra of SiC/C sample.

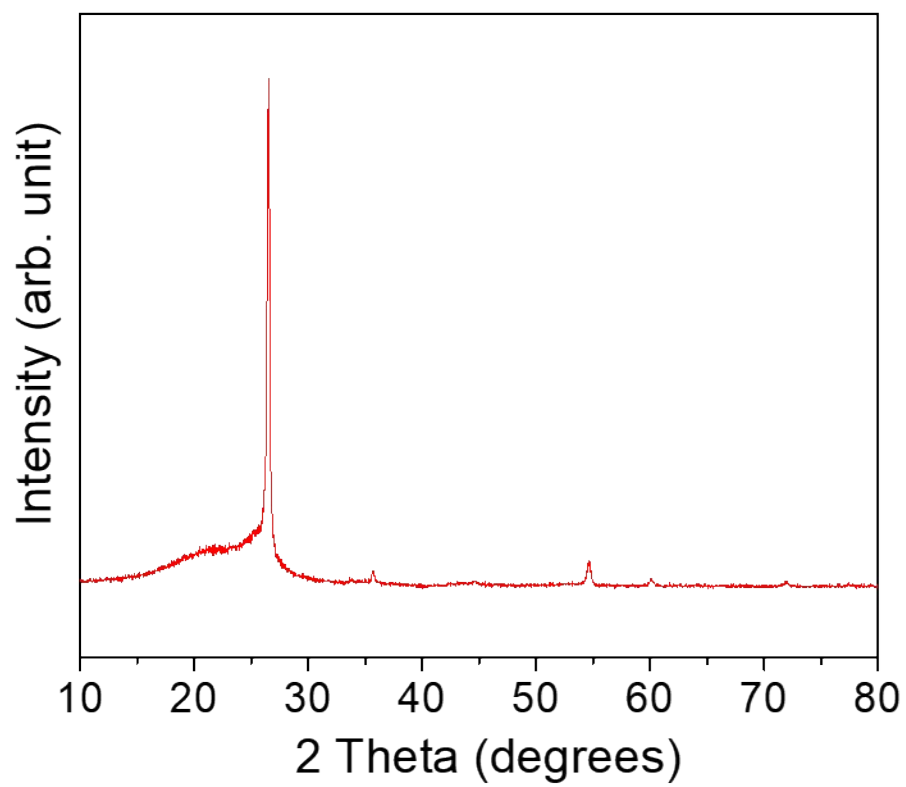

**Fig. S4.** XRD of 2h RuO<sub>x</sub>/SiC/C sample.

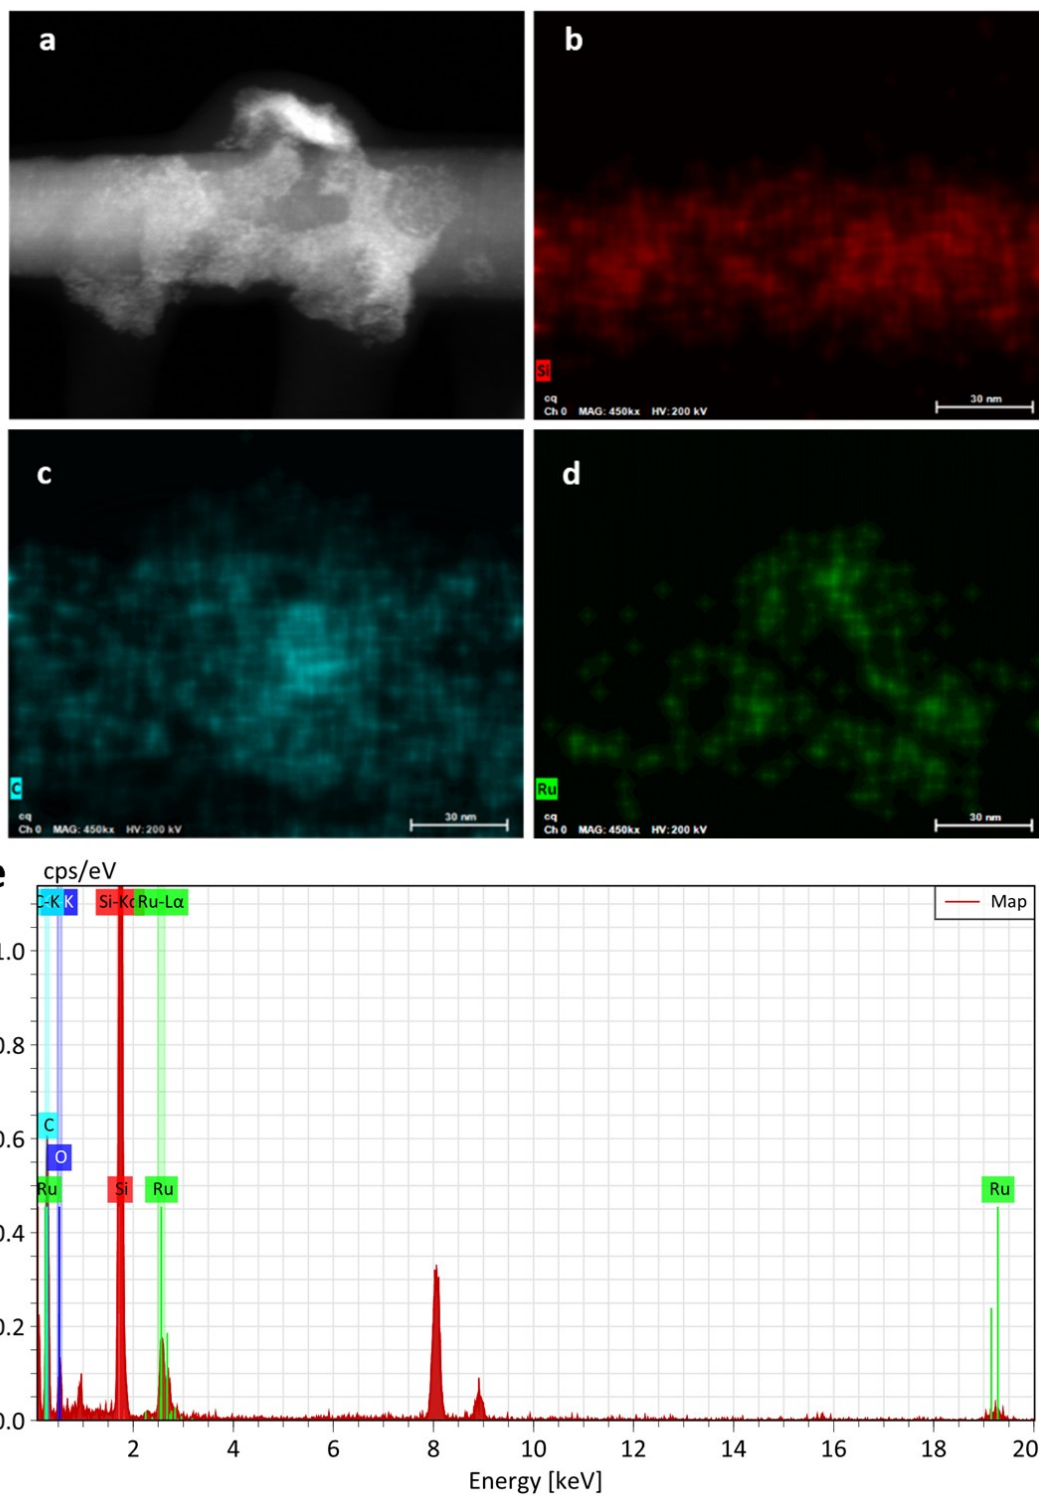

**Fig. S5.** TEM image of 2h RuO<sub>x</sub>/SiC/C (a) and the corresponding mapping of silicon (b), carbon (c), ruthenium (d); in addition to EDX elemental mapping (e).

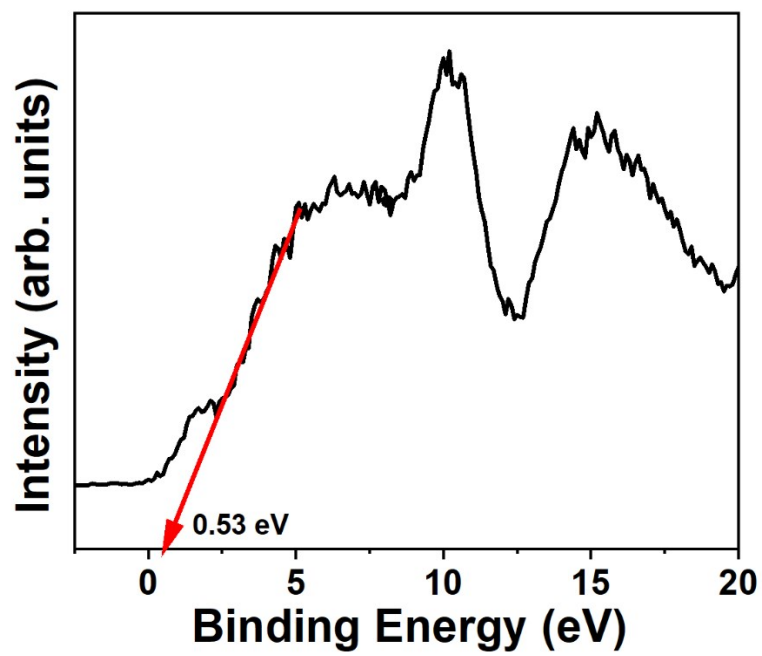

Fig. S6. XPS valence band spectra of 2h RuO<sub>x</sub>/SiC/C substrate.

Table S1: The atomic ratio of specific elements in SiC/C.

| <b>Name</b> | <b>Peak BE</b> | <b>FWHM (eV)</b> | <b>Atomic (%)</b> |
|-------------|----------------|------------------|-------------------|
| Si 2p       | 101.12         | 2.90             | 38.36             |
| C 1s        | 283.38         | 3.27             | 47.33             |
| O 1s        | 531.94         | 3.43             | 14.31             |
